# Supplementary material for: Impaired aldehyde detoxification exacerbates motor deficits in an alpha‐synuclein mouse model of Parkinson's disease
Source: PubMed Central journal article supplement (PMC10498093; doi:10.1002/brb3.3150), 2023-07-14

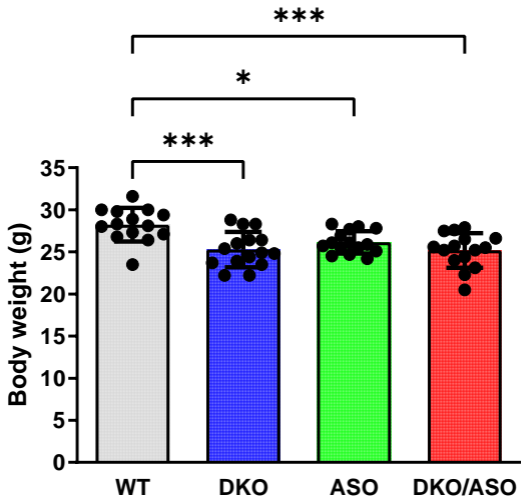

Supplement: BRB3-13-e3150-s001.pdf [file BRB3-13-e3150-s001.pdf]
