# Supplementary material for: Impaired aldehyde detoxification exacerbates motor deficits in an alpha‐synuclein mouse model of Parkinson's disease
Source: PubMed Central journal article supplement (PMC10498093; doi:10.1002/brb3.3150), 2023-07-14
Supplement: BRB3-13-e3150-s002.pdf [file BRB3-13-e3150-s002.pdf]

**a**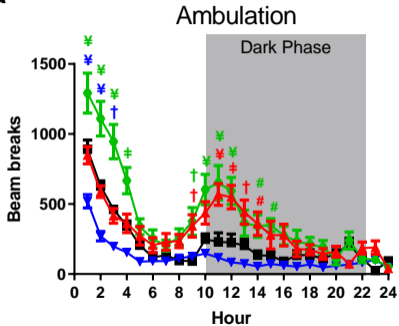**b**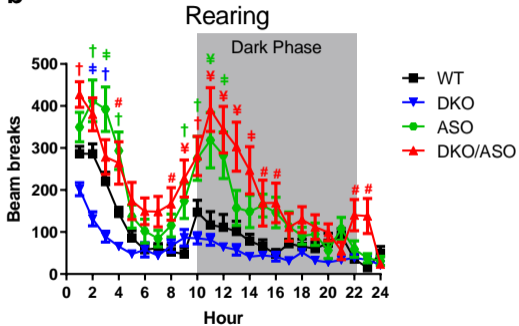

- WT
- ▼ DKO
- ASO
- ▲ DKO/ASO
